# Supplementary material for: The Lectin Pathway of Complement Activation Is a Critical Component of the Innate Immune Response to Pneumococcal Infection
Source: PubMed Central journal article supplement (PMC3390405; doi:10.1371/journal.ppat.1002793), 2012-07-05
Supplement: ppat.1002793.s002.pdf [file ppat.1002793.s002.pdf]

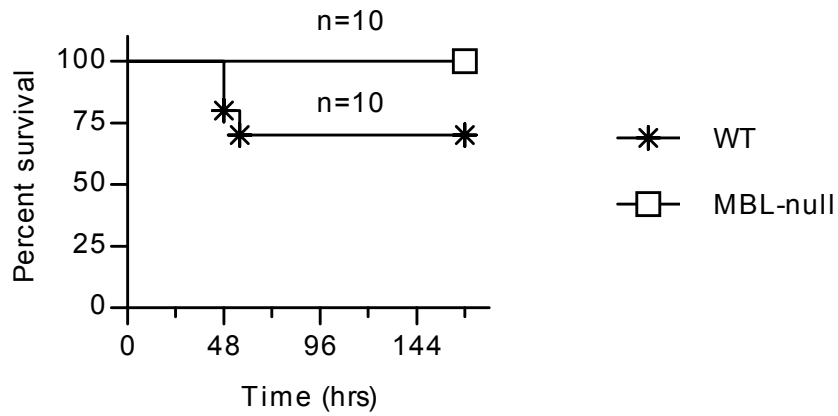

**Supplementary figure 2.** MBL deficiency does not increase susceptibility to pneumococcal infection.

Ten-week old female MBL-null mice (open squares) and sex and age-matched WT C57BL/6 controls (crosses) were infected intranasally with  $1 \times 10^6$  cfu *S. pneumoniae* D39 and the course of the infection monitored for one week. There was no significant difference in mortality between the groups (n=10 per group;  $p > 0.05$ , Mantel-Cox log-rank test).
