# Supplementary material for: The Lectin Pathway of Complement Activation Is a Critical Component of the Innate Immune Response to Pneumococcal Infection
Source: PubMed Central journal article supplement (PMC3390405; doi:10.1371/journal.ppat.1002793), 2012-07-05
Supplement: ppat.1002793.s004.pdf [file ppat.1002793.s004.pdf]

|              | Serotype 18 |        |       | Serotype 6 |       |       | Serotype 3 |       | Serotype 2 |
|--------------|-------------|--------|-------|------------|-------|-------|------------|-------|------------|
|              | Pt3017      | Pt2899 | Pt534 | Pt586      | Pt547 | Pt376 | Pt815      | Pt500 | D39        |
| <b>Human</b> |             |        |       |            |       |       |            |       |            |
| MBL          | ns          | ns     | ns    | ns         | ns    | ns    | ns         | ns    | ns         |
| L-ficolin    | ✓✓          | ✓✓     | ✓✓    | ✓✓         | ✓✓    | ✓✓    | ✓✓         | ✓✓    | ✓✓         |
| M-ficolin    | ns          | ns     | ns    | ns         | ns    | ns    | ns         | ns    | ns         |
| H-ficolin    | ns          | ns     | ns    | ns         | ns    | ns    | ns         | ns    | ns         |
| CL-11        | ✓✓          | ✓✓     | ✓✓    | ✓✓         | ✓✓    | ✓✓    | ✓✓         | ✓✓    | ✓✓         |
| <b>Mouse</b> |             |        |       |            |       |       |            |       |            |
| MBL-A        | ns          | ns     | ns    | ns         | ns    | ns    | ns         | ns    | ns         |
| MBL-C        | ✓           | ns     | ✓     | ns         | ✓     | ✓     | ✓          | ✓     | ns         |
| Ficolin A    | ✓✓          | ✓      | ✓✓✓   | ✓          | ✓✓✓   | ✓     | ✓          | ✓     | ✓✓         |
| CL-11        | ✓✓          | ✓✓     | ✓✓    | ✓✓         | ✓✓    | ✓✓    | ✓✓         | ✓✓    | ✓✓         |

**Supplementary table 1.** Binding of lectin pathway recognition molecules to different strains of *S. pneumoniae*.

Nine clinical isolates of *S. pneumoniae* representing three different serotypes (18, 6B and 3), plus the D39 model strain, were tested for binding of human and murine recognition molecules using the solid-phase binding assay described in the main text. With human serum the results were remarkably consistent: Only L-ficolin and CL11 (alias CL-K1) bound to the bacteria. Using murine serum there was some variation in the binding of MBL-C and ficolin A. Two isolates (one type 18, one type 6) had a very high affinity for ficolin A. None of the strains bound MBL-A, while all bound murine CL-11 with similar affinities. (ns= not significant).

MBL-C and ficolin A binding differed amongst strains of the same serotype, indicating that capsular polysaccharide is unlikely to be the main determinant of recognition by the lectin pathway.

Isolates of *S. pneumoniae* were kindly provided by Prof. Herminia de Lancastre, Instituto de Tecnologia Química e Biológica, Oeiras, Portugal [1].

1. Sa-Leao R, Nunes S, Brito-Avo A, Frazao N, Simoes AS, et al. (2009) Changes in pneumococcal serotypes and antibiotypes carried by vaccinated and unvaccinated day-care centre attendees in Portugal, a country with widespread use of the seven-valent pneumococcal conjugate vaccine. Clin Microbiol Infect 15: 1002-1007.
