# Supplementary material for: The Lectin Pathway of Complement Activation Is a Critical Component of the Innate Immune Response to Pneumococcal Infection
Source: PubMed Central journal article supplement (PMC3390405; doi:10.1371/journal.ppat.1002793), 2012-07-05
Supplement: ppat.1002793.s005.pdf [file ppat.1002793.s005.pdf]

| Product<br>(size)       | Sequence (5' to 3')                             |
|-------------------------|-------------------------------------------------|
| IL1 $\beta$<br>(247bp)  | CACTCATTGTGGCTGTGGAGA<br>AGGTGGAGAGCTTTCAGCTCA  |
| TNF $\alpha$<br>(237bp) | CCTCACACTCAGATCATCTTCTCA<br>GTGGGTGAGGAGCACATAG |
| GAPDH<br>(211bp)        | GTGCTGCCAAGGCTGTG 3<br>AGACAACCTGGTCCTCAGTGTA   |
| IL6<br>(95bp)           | CAAAGCCAGAGTCCTTCAGA<br>CACTCCTTCTGTGACTCCA     |
| IL10<br>(86bp)          | CTTGCACTACCAAAGCCACA<br>TAAGAGCAGGCAGCATAGCA    |
| INF $\gamma$<br>(81bp)  | CCTGCGGCCTAGCTCTGA<br>CAGCCAGAAACAGCCATGAG      |
| MIP-2<br>(90bp)         | ATCCAGAGCTTGAGTGTGAC<br>AAGGCAAACCTTTTTGACCGCC  |

**Table S2.** Primers used in this study.
